# Supplementary material for: Marinopyrrole Derivatives with Sulfide Spacers as Selective Disruptors of Mcl-1 Binding to Pro-Apoptotic Protein Bim
Source: MDPI journal article supplement (doi:10.3390/md12084311), 2014-07-29

## Supplementary Information

**Figure S1.** Effects of marinopyrroles on nuclear and cellular morphology.

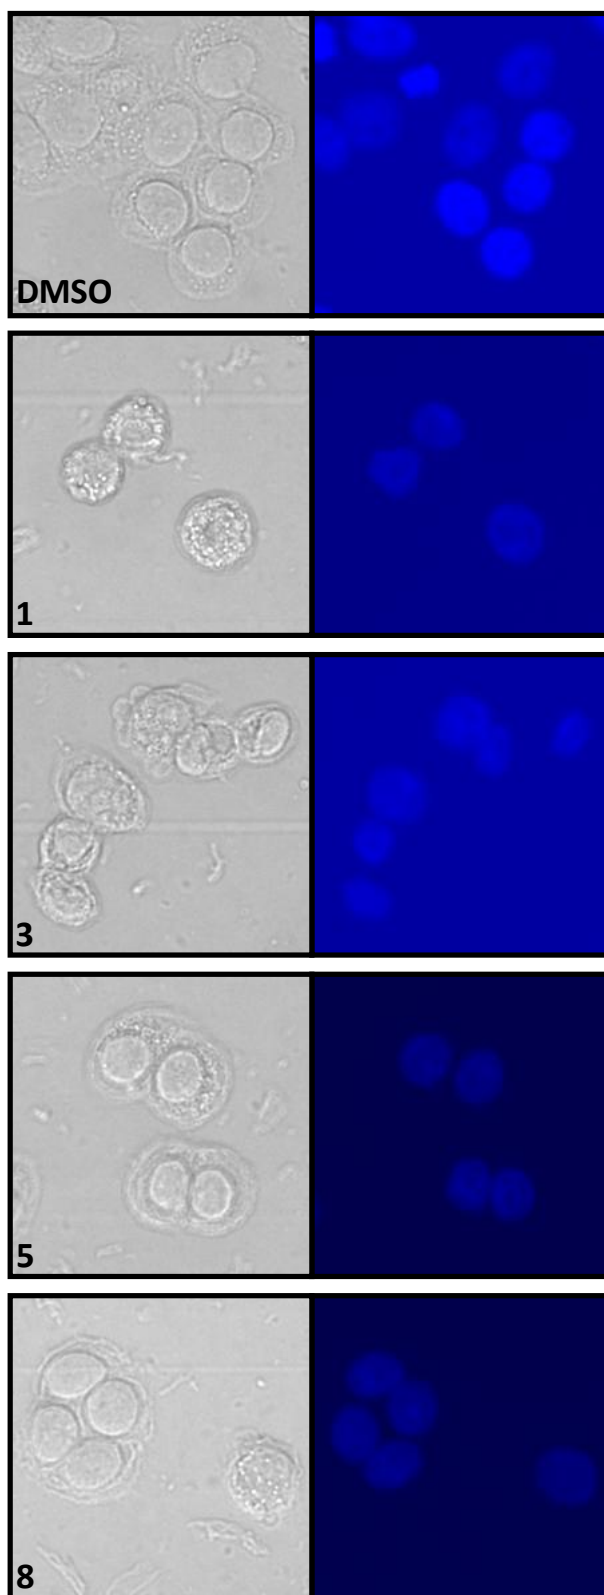

Supplement: s1 [file s1]
